# Supplementary material for: The Role of Temperature on the Degree of End-Closing and Filling of Single-Walled Carbon Nanotubes
Source: MDPI journal article supplement (doi:10.3390/nano11123365), 2021-12-11
Supplement: s1 [file s1]

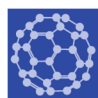

# The Role of Temperature on the Degree of End-Closing and Filling of Single-Walled Carbon Nanotubes

Magdalena Kierkowicz <sup>1</sup>, Elzbieta Pach <sup>2</sup>, Julio Fraile <sup>1</sup>, Concepción Domingo <sup>1</sup>, Belén Ballesteros <sup>2</sup> and Gerard Tobias <sup>1,\*</sup>

<sup>1</sup> Institut de Ciència de Materials de Barcelona (ICMAB-CSIC), Campus UAB, 08193 Bellaterra, Barcelona, Spain; mkierkowicz@gmail.com (M.K.); julio@icmab.es (J.F.); conchi@icmab.es (C.D.)

<sup>2</sup> Catalan Institute of Nanoscience and Nanotechnology (ICN2), CSIC and the Barcelona Institute of Science and Technology, Campus UAB, 08193 Bellaterra, Barcelona, Spain; epach@icmab.es (E.P.); belen.ballesteros@icn2.cat (B.B.)

\* Correspondence: gerard.tobias@icmab.es

## Steam treatment

As-received SWCNTs, containing a fraction of DWCNTs, were finely ground in an agate mortar with a pestle, loaded into a silica tube end exposed to steam under Ar atmosphere at 900 °C during 4 h. Then, they were refluxed with 6 M HCl (PanReac Appli-Chem) at 110 °C overnight. The resulting sample was rinsed with distilled water until neutral pH, filtered onto a polycarbonate membrane (Whatman Cyclopore, pore size 0.2 µm) and dried in an oven at 100 °C overnight.

## Nitrogen adsorption-desorption experiments

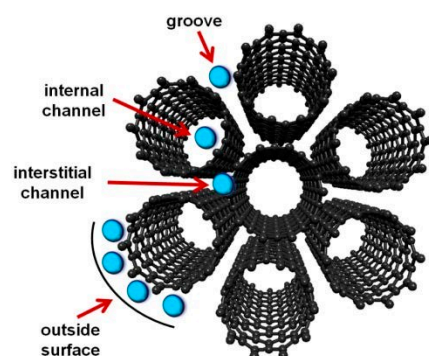

**Figure S1.** Schematic representation of gas adsorption in a bundle of SWCNTs. The blue dots represent the gas molecules adsorbed on accessible surfaces.

**Table S1.** Apparent specific surface area ( $S_{\text{BET}}$ ) and cumulative pore volume up to 1.5 nm pore diameter ( $V_c$ ) of as-received and empty purified/annealed samples. Data obtained from low temperature nitrogen adsorption and NLDFT calculations.

| Sample      | $S_{\text{BET}}$ [ $\text{m}^2\text{g}^{-1}$ ] | $V_c$ [ $\text{cm}^3\text{g}^{-1}$ ] |
|-------------|------------------------------------------------|--------------------------------------|
| As-received | 1246                                           | 0.146                                |
| RT          | 1263                                           | 0.231                                |
| 400 °C      | 1285                                           | 0.220                                |
| 700 °C      | 1196                                           | 0.221                                |
| 900 °C      | 1157                                           | 0.199                                |
| 1100 °C     | 791                                            | 0.194                                |

### Raman spectroscopy

**Table S2.**  $I_D/I_G$  Raman ratio of purified and annealed samples. Each value is averaged based on three measurements. CNTs were excited using 532 nm laser wavelength.

| Sample  | $I_D/I_G$ | Error |
|---------|-----------|-------|
| RT      | 0.13      | 0.03  |
| 400 °C  | 0.11      | 0.03  |
| 700 °C  | 0.13      | 0.01  |
| 900 °C  | 0.14      | 0.01  |
| 1100 °C | 0.12      | 0.02  |

### Electron microscopy

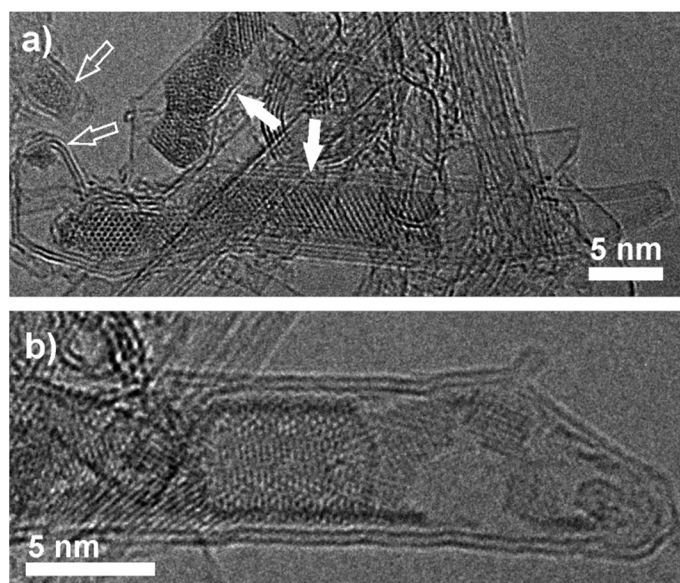

**Figure S2.** Additional HRTEM images of  $\text{EuCl}_3$ @CNTs prepared at 1100 °C. As a guide to the eye, white arrows point to CNTs filled with nanowires of  $\text{EuCl}_3$ , empty white arrows to filling with nanoparticles, and black arrows point to closed ends. A single-layered inorganic nanotube of  $\text{EuCl}_3$  was found inside the cavities of a large diameter DWCNT (Figure S2b), thus creating a tubular (1D) van der Waals heterostructure,
